# Supplementary material for: A comparison of human and mouse gene co-expression networks reveals conservation and divergence at the tissue, pathway and disease levels
Source: PubMed Central journal article supplement (PMC4654840; doi:10.1186/s12862-015-0534-7), 2015-11-20
Supplement: 12862_2015_534_MOESM2_ESM.pdf [file 12862_2015_534_MOESM2_ESM.pdf]

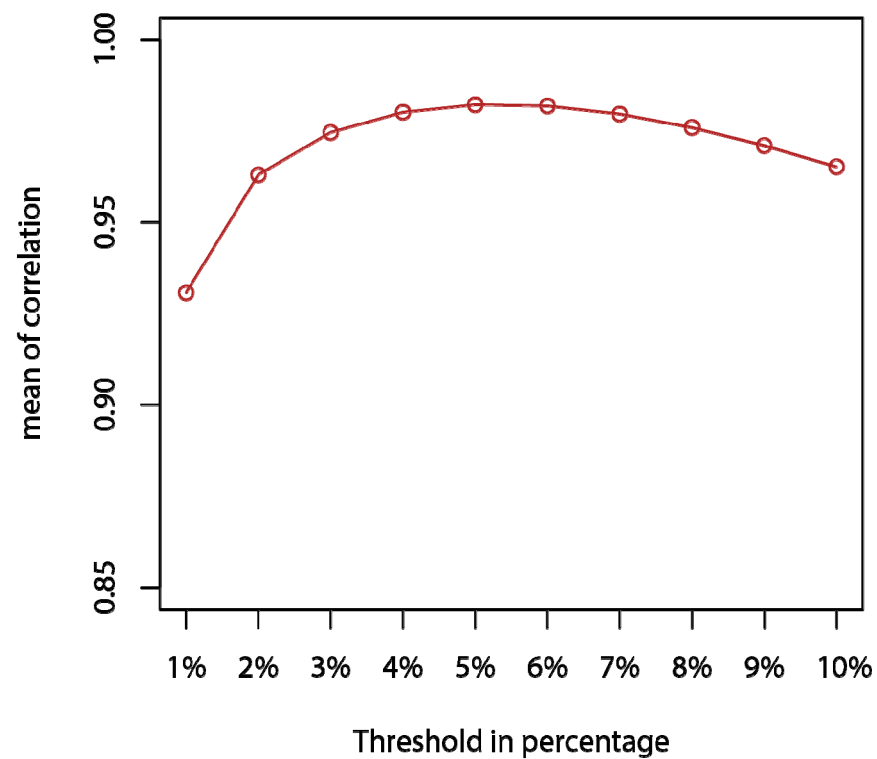

**Figure S1 – Comparison of thresholds used to retrieve the number of commonly co-expressed genes (CCG).** Threshold percentage from 1 to 10 were used to retrieve the number of CCG from the human and mouse co-expression maps (Methods). The number of CCG of each threshold was correlated (Spearman method) with the number of CCG found with other thresholds. In any case, the correlation value resulted to be no lower than 0.88, indicating that the choice of the threshold do not significantly influence the ranking of homologs in terms on number of CCG. The mean of correlations of each threshold with the other ones is reported on the y-axis. Following the line of the chart we can notice that the best threshold selection is at 5% since it correlates the most with the other percentage thresholds.

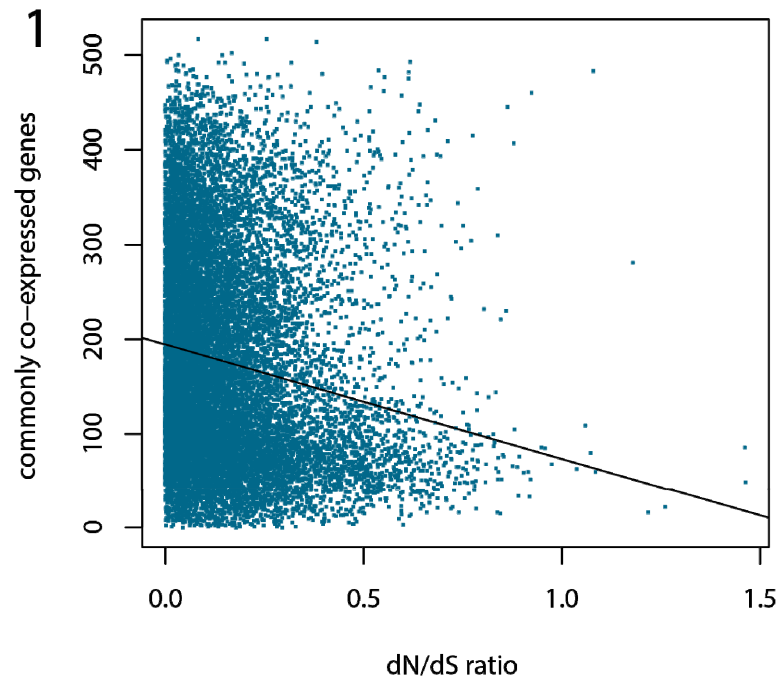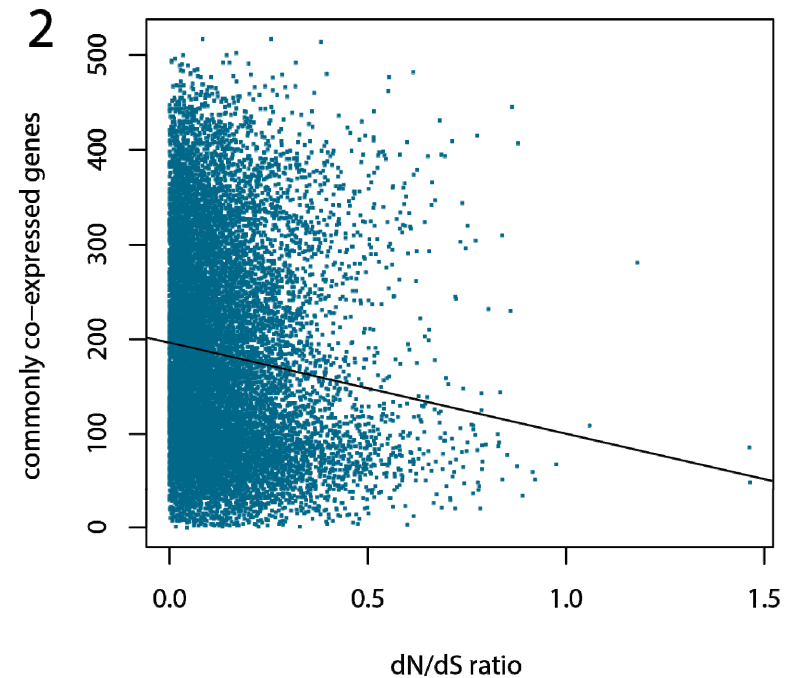

**Figure S2 – The dN/dS ratio is plotted against the number of commonly co-expressed genes (CCG) for each homolog.** As the proportion of non-synonymous substitutions increases, the number of CCG decreases, showing a relationship between the sequence divergence and preservation of connectivity between the mouse and human species. A simplistic linear regression line has been fitted to the data, although the relationship shows a tendency towards an L-shaped model. In plot n.1 the entire set of homologs were used, while in the plot n.2 only the homologs with one-to-one orthology relationship were used.

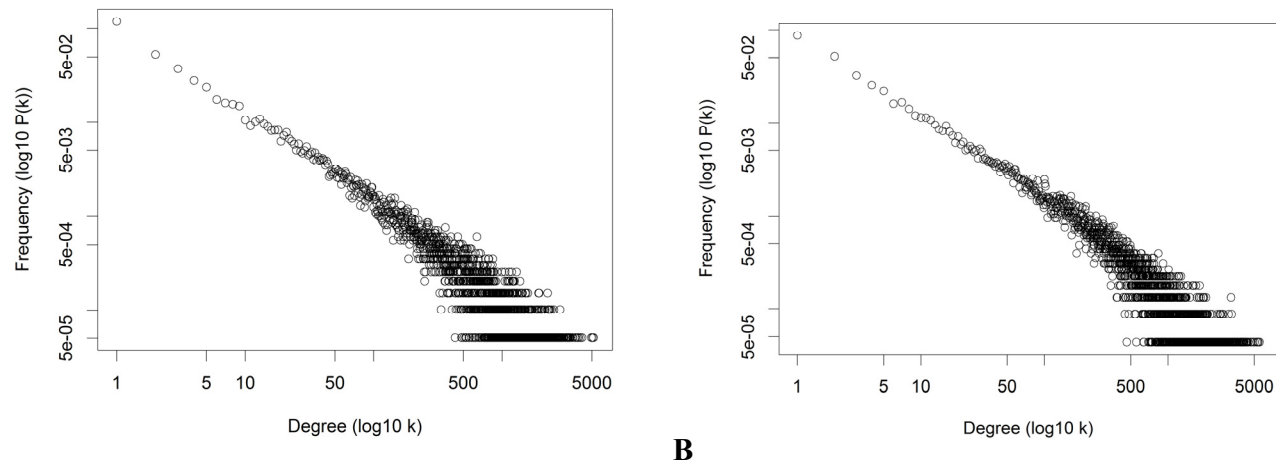

**Figure S3 – Log-log plots of the degree distributions of (A) human and (B) mouse networks.** Both cases follow a power law distribution with no relevant topological differences. The parameters of the power law distribution are the exponent ( $\gamma$ ) and the minimum connectivity value  $k$  ( $k_{min}$ ), which have been estimated for both networks ( $\gamma=-3.552$  and  $k_{min}=1091$  for the human network;  $\gamma=4.158$  and  $k_{min}=1707$  for the mouse network).

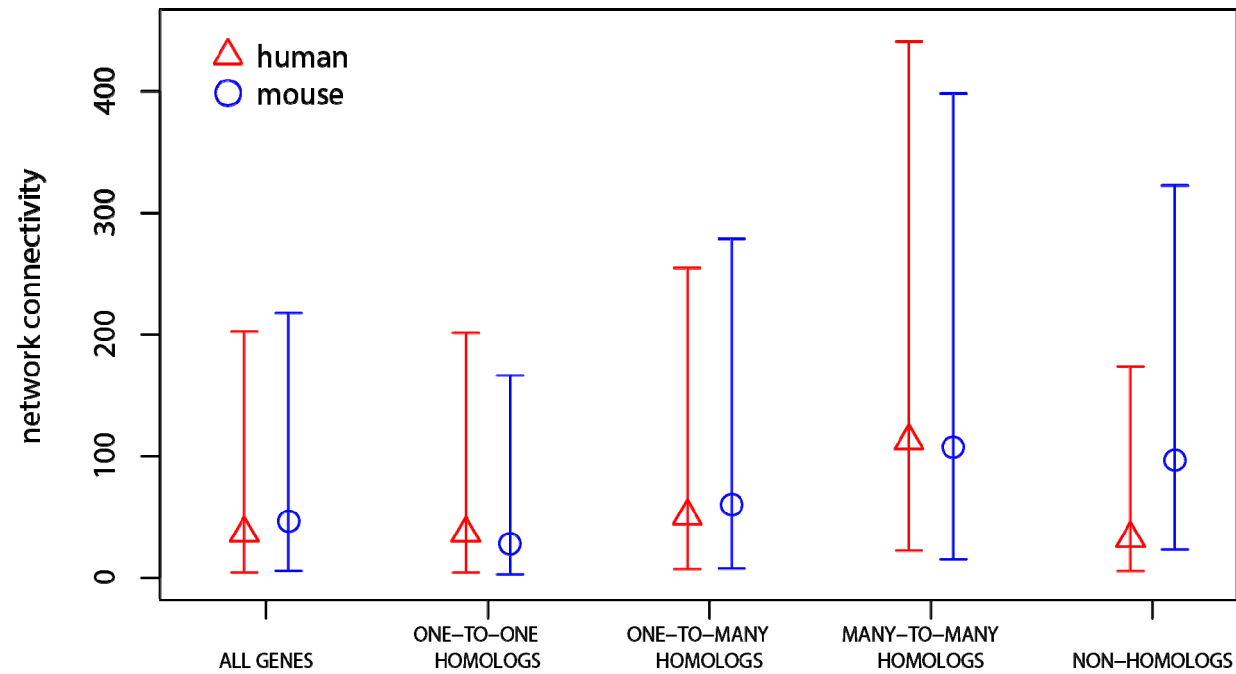

**Figure S4 – Network connectivity in different categories of genes defined on the homology relationship between mouse and human.** In the figure, the central symbol indicate the median and the error bars extending from the symbols indicate the interquartile range. The network connectivity generally extends in a similar range for the gene categories, apart from the non-homologs genes that shows an overall increased connectivity in the mouse species.

### i. Conservation of co-expression

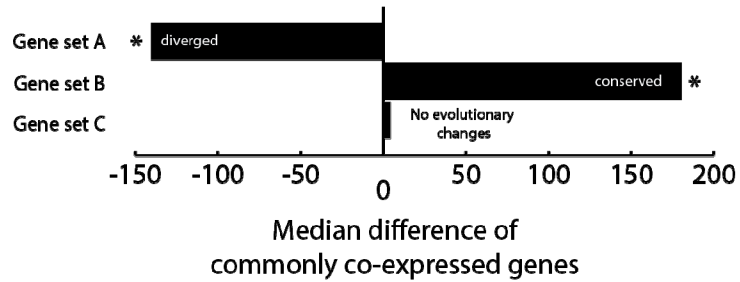

### ii. Differential connectivity

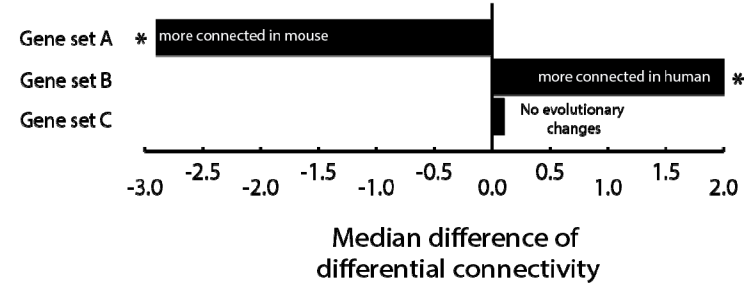

### iii. Proportion of duplication events

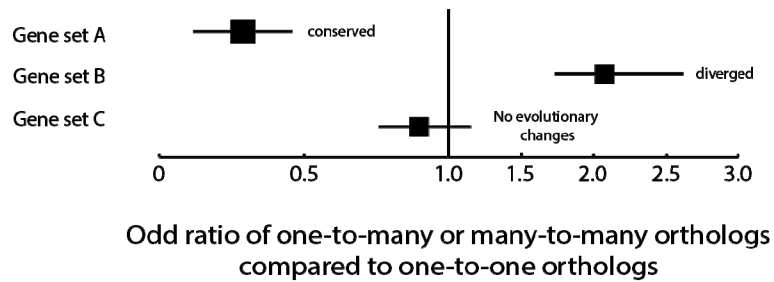

### iv. Proportion of non-homologs

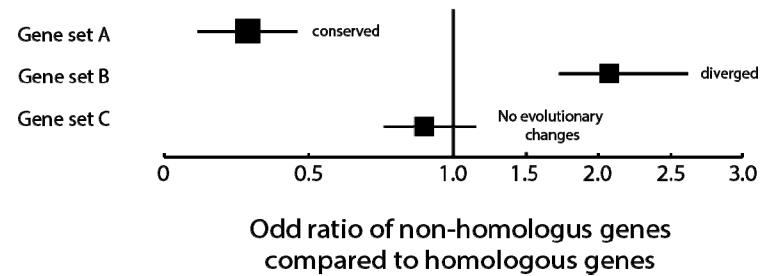

**Figure S5. Parameters used to define the evolutionary changes that occur in a genes set between humans and mice.** A Mann Withney U test has been used to compare the i) commonly co-expressed genes and ii) differential connectivity values of the homologs of a gene set with the values of the remaining homologs. As a measurement to indicate the divergence of the distribution of the values of a gene set from the ones of the remaining homologs, in a bar plot we reported the median difference of the two distributions for each gene set with an asterisk indicating the significant results with  $FDR < 0.05$ . A Fisher's exact test has been used to compare the proportion of iii) one-to-many orthologs and iv) homologs of a gene set with the proportion of the remaining homologs and non-homologs respectively. The forest plots display the odd-ratio from the Fisher's exact test, plus the 95% confidence intervals.

Table S1– Co-expression analysis results of 20 selected genes from the Reactome pathway PI3K cascade, an essential signaling pathway that is commonly over-activated in cancer. The entire gene set of the PI3K cascade pathway is composed by 68 genes the median value of numbers of common co-expressed genes is significantly lower than expected. Therefore here are reported the top 20 genes with low number of common co-expressed genes. The last column show which genes are commonly co-expressed.

| Human Gene | Mouse Gene | Homology Type | # of Common Co-expressed genes | Differential connectivity | Genes commonly co-expressed                                                                                                                                                                                                                                                                                                                                                                                                                          |
|------------|------------|---------------|--------------------------------|---------------------------|------------------------------------------------------------------------------------------------------------------------------------------------------------------------------------------------------------------------------------------------------------------------------------------------------------------------------------------------------------------------------------------------------------------------------------------------------|
| MTOR       | Mtor       | One-to-one    | 11                             | 0.5                       | HOXA6, KCNJ10, LIPE, MAP2, RAP1GAP, SH3GL3, CCL27, NCDN, LPAR3, ATRNL1, TLN2                                                                                                                                                                                                                                                                                                                                                                         |
| PIK3R4     | Pik3r4     | One-to-one    | 12                             | -4.72727                  | CLTC, EGR1, KCNJ10, NPAT, PRKD1, RFX3, SH3GL3, ARHGAP11A, BRD8, ZCCHC11, TMEM35, BEND5                                                                                                                                                                                                                                                                                                                                                               |
| FGF23      | Fgf23      | One-to-one    | 25                             | -0.0522                   | CDH12, CPB1, CYP26A1, DAZL, GPR25, GSC2, KCNJ13, MAGEA1, MAGEA3, MAGEA11, NTS, RCVRN, CCL4, CCL18, CLDN5, SOX14, MMP20, PRG4, SLC34A2, CRNN, SHANK1, FNDC8, CA10, TNIP3, CHODL                                                                                                                                                                                                                                                                       |
| AKT2       | Akt2       | One-to-one    | 30                             | -34.2857                  | ATP2A1, CST4, CST5, CYP2D6, DUSP7, EFNA5, FASN, GDF10, GPR15, HOXC5, IFNA7, IFNA17, KRT5, LIPE, MYOC, NFIX, NMBR, PPY, RARG, STRN, TNNT3, ADAMTS2, TP53111, RAB3D, KIAA0040, SORBS3, MLXIP, ARHGEF28, GREB1L, NUDT7                                                                                                                                                                                                                                  |
| PRKAG1     | Prkag1     | One-to-one    | 32                             | 3.909091                  | ADCY6, ENSA, GMDS, IFI35, FADS3, ME2, MFAP3, OXA1L, PPP1CA, SUPT4H1, TAF12, OXSR1, ARPC1B, VAT1, RNASEH2A, OIP5, SEPT8, PLD3, TOR1AIP1, PHGDH, HILPDA, GMPR2, PDP1, COMMD8, MOSPD1, NUP37, TMEM185B, TMEM164, TEX30, ZDHHC24, GATC, DPY19L4                                                                                                                                                                                                          |
| FRS2       | Frs2       | One-to-one    | 35                             | 0                         | DAGLA, CRYAB, F3, INHBB, KCNK2, KITLG, PBX1, PCP4, PDK4, RAC3, RFXAP, SCD, PIP5K1A, B3GALNT1, RUSC2, GJC1, HIPK3, OLFM1, ZBTB18, CCL27, RCAN3, TANC2, LRP12, MYEF2, SLC22A17, RAB23, PDP1, BEX4, OLFML3, ZNF471, NDRG4, REEP1, ABHD8, GREB1L, ZFP2                                                                                                                                                                                                   |
| PIK3C3     | Pik3c3     | One-to-one    | 39                             | -1.72727                  | ATM, ATP2B1, CCNT2, ING2, NPAT, CDK17, SH3GL3, SRPK2, ZNF43, CUL4B, LATS1, RPS6KA5, PJA2, TOPORS, ZBTB18, AKAP11, WDR47, DOPEY1, ANKLE2, ANKRD12, TSPYL4, ZCCHC11, MORC3, ACAP2, TIPARP, PIK3R4, SUCO, FAM49B, FAM63B, FBXO34, EXOC1, TMX4, GRAMD1B, TMEM35, YTHDC2, MSANTD2, ZNF665                                                                                                                                                                 |
| CAB39L     | Cab39l     | One-to-one    | 41                             | 0.090909                  | ACADL, ADH1B, ADH1C, AOX1, ASPA, SERPING1, C3, CEBPA, CYP27A1, AKR1C1, CFD, FABP4, EFEMP1, GHR, GPX3, GSTT2B, CFH, HLA-DQA1, HMGCS2, HPGD, LPL, PC, PCOLCE, PDK4, ENPP2, FXYD1, RARRES2, RENBP, SCD, SNCG, SOD3, TIMP3, GPR137B, ZFP36, PEX11A, EMILIN1, EPB41L3, CYP39A1, BEX4, C3orf14, ZNF471                                                                                                                                                     |
| STK11      | Stk11      | One-to-one    | 49                             | 0.833333                  | ACADS, ALAD, CSNK1G2, E2F4, GPR15, LIPE, PCNT, PDK2, FXYD1, UPF1, SBF1, SNAPC4, VAMP2, TNXB, NR1H2, SYMPK, LTBP4, SLC43A1, STOML1, FXR2, DHX38, SF1, RBM19, DNAL4, CDC42EP2, DEAF1, USP20, EHMT2, FASTK, PPP6R1, CIZ1, INTS1, AKAP8L, TRIB2, PRSS50, CXXC1, MBD3, TBC1D13, C1orf159, IFT122, C7orf26, ASPSCR1, ATG9A, CHMP6, PTDS2, RHOT2, DCAF15, IZUMO4, EHB1L1                                                                                    |
| FGF3       | Fgf3       | One-to-one    | 53                             | 0.458333                  | ALOX12B, AQP5, CDH12, CEACAM8, CHRM2, CST1, CST5, EMX2, GFRA3, HBQ1, HCRTR1, HSD3B2, IBSP, IFNA2, IFNA6, IFNA8, IFNA21, KCNA10, AFF3, MAGEA11, MAGEB4, MTNR1B, NTSR1, OPCML, OR3A1, SERPINB4, FGF23, CABP1, KCNE2, KLF8, CLCA4, OR11A1, OR2J2, TAS2R3, TAS2R7, TAS2R13, RXFP3, KRT76, LGSN, CABP5, MS4A5, OR12D3, CCT8L2, SEC14L3                                                                                                                    |
| FGF10      | Fgf10      | One-to-one    | 55                             | -0.41176                  | SERPINA3, ADRA2A, CCK, CDH18, CHGB, CIDEA, CRHBP, CYP3A5, DCN, CFD, EPYC, EMX2, FIGF, GCG, GRP, CFH, HOXD11, HSD3B2, MME, MSMB, NPY1R, PTGS2, RNASE2, SCN7A, CCL2, CCL11, CXCL6, SH3GL2, SPINK1, CRISP2, TWIST1, VIP, SCG2, KL, ADIPOQ, CRISP3, TBR1, ZFPM2, GREM1, FAM3B, TNIP3, SPHKAP, KRTAP9-3, ANKRD30A, FAM46B, SPIC, OSR1, CPNE4, FAM3D, SOWAHA, C2orf61, HAPLN4, FAM19A1                                                                     |
| RPTOR      | Rptor      | One-to-one    | 62                             | 0.090909                  | CCNA2, CDC20, CDK5, CENPE, CPE, DPYSL3, EMP3, ENO2, F3, FDXR, GPC1, ID3, LIG1, MAD2L1, MCM2, MCM4, MCM5, MT1H, SERPINE1, PLK1, HTRA1, RAC3, RENBP, ROBO1, RRM2, SCD, SLC4A2, FSCN1, STXBP1, TIMP3, TUBB2A, CLIP2, AKR1C3, WASF1, PRC1, INA, DLGAP5, KIF20A, TUBB3, TACC3, PLK2, EMILIN1, OIP5, HSPA4L, TENM4, FAM127B, NGFRAP1, ATAD2, PSAT1, IQCJ-SCHIP1, PBK, DMAP1, AKR1B10, CBX8, ABHD8, LMNB2, ZMYND19, CPT1C, KIAA1958, PLBD2, CENPW, SBK1     |
| RHEB       | Rheb       | One-to-one    | 64                             | -52.3333                  | AARS, SLC25A4, APBB2, RND3, ATP1B1, BPHL, DDR1, CCNH, CDK8, CLN5, CRYZ, CTNND1, CTPS1, CYC1, DFNA5, DLD, ECM1, EFN2, EPS8, GNAI1, GOT2, HMGCL, MYH10, NDUFS1, POLR2C, HTRA1, PSMA2, PSMD3, PTH1R, TWF1, RDX, RNF5, SCD, ITSN1, SHB, SLC16A1, UAP1, TBCE, TSPAN4, DYNLL1, SNX3, TSC22D1, GSTO1, NPEPPS, SOCS5, HRSP12, TACC2, ERLIN1, MTX2, NCKAP1, DSTN, EID1, CLIC4, PHGDH, FAM162A, NME7, PSAT1, WBP5, LAPTM4B, SEPT11, PNO1, APOO, TEX30, CEP170B |

|        |        |             |    |          |                                                                                                                                                                                                                                                                                                                                                                                                                                                                                                          |
|--------|--------|-------------|----|----------|----------------------------------------------------------------------------------------------------------------------------------------------------------------------------------------------------------------------------------------------------------------------------------------------------------------------------------------------------------------------------------------------------------------------------------------------------------------------------------------------------------|
| STRADA | Strada | One-to-one  | 64 | 0.181818 | ATP2B4, ATP6V1G2, CA11, CHD3, TRIM37, NPAT, SALL2, SH3GL3, SNAPC4, SNRNP70, VAMP1, LRP8, ALMS1, USP11, PIP4K2B, CHST1, MADD, FAM193A, SKAP1, ZMYM3, RPS6KA5, STOML1, DZIP3, IPO13, RASSF2, SFI1, KIAA0753, SUPT7L, MICU1, RASL10A, ZNF266, AP3M2, WDR47, NINL, CLUAP1, POGZ, GPATCH8, SEPT6, GGA3, PACS2, ANKRD12, ZCCHC11, SZT2, ZDHHC17, GLTSCR1L, CABIN1, ADAT1, PATZ1, IFFO1, VPS33B, TRIB2, SNX11, BAZ2B, SCAPER, PARD6A, C1orf159, GRAMD1B, WDR19, TSPYL2, MICAL1, DYNC2H1, CENPT, BHLHB9, SNX27   |
| INS    | Ins1   | One-to-many | 66 | 4.545455 | CCR3, COL2A1, CPB1, EMX2, GCG, MSTN, GP2, FFAR3, GRIA3, HIST1H1A, IFNA2, IFNA6, IFNA8, IFNA21, AFF3, MAGEB4, MAT1A, MYH3, NEUROD1, NTSR1, OR3A1, PAX5, PCSK1, PLIN1, PMCH, PNLIPRP1, REG1A, RNASE3, SERPINB4, SI, TFF2, TGM1, RGS11, WISP2, FRMPD4, PRG3, OR7C2, OR2J2, CHIA, TAS2R7, TAS2R13, CELA2B, UGT2B28, DDX4, NXPE4, KIF26B, BTNL2, CELA2A, MS4A5, TTC21B, NANOG, GGT1                                                                                                                           |
| FGF20  | Fgf20  | One-to-one  | 66 | 26.8     | SERPINA3, ADRA2C, CACNA1S, CBLN1, CDH12, CEACAM8, CHRM2, CHRM5, CHRNA1, IFNA2, IFNA4, IFNA6, IFNA21, KRT3, MAGEB1, MYF5, MYH3, MYL1, PLIN1, PRSS1, PSG5, PSG3, RNASE3, SERPINB4, CCL11, F2RL3, SPAG6, OR511, SPINK5, ATP1B4, OR52A1, DKK4, CHIA, CDH19, IL19, TAS2R7, TAS2R13, TAS2R10, LGSN, FEZF2, MS4A5, ZBBX, TNIP3, POF1B, BAIAP2L2, KRTAP1-1, SLC25A31                                                                                                                                             |
| INSR   | Insr   | One-to-one  | 69 | -0.08333 | ADH1A, JAG1, ANG, ASPA, CLDN7, CYP3A5, DCN, AKR1C1, DIO1, FABP4, FAT1, FMO5, GRB14, GSTM5, GUCY1A3, HLF, NR4A1, IGFBP5, MAOB, MCC, PLXNB1, PRELP, SCNN1A, SEPP1, SOX9, TLE2, TNS1, CILP, SLC43A1, CHST1, ALDH4A1, ADAMTS2, NA, RHOBTB1, FAM13A, CTDSPL, RCAN2, FBLN5, MTMR11, C10orf10, FILIP1L, NINL, TRIM2, ABCA5, BAMBI, GPR124, AUTS2, OPLAH, NBEA, TRIB2, KLF15, MLXIPL, DACT1, TMEM100, TMEM140, TMEM176A, CAMK2N1, SYBU, PDGFC, OLFML3, PLSCR4, LHPP, DEPTOR, CLMN, EGLN3, HSPB6, ZCCHC24, GPR116 |
| INS    | Ins2   | One-to-many | 72 | 2.388889 | ALOX12B, ALOX15, AQP5, CCKAR, CDH16, CDH17, CHRM2, CNGA3, CPA1, CPB1, CRYBA1, CRYGA, CST1, CST5, DSG1, GBX1, GC, GCG, GP2, GPR31, HBQ1, HSD3B1, HSD3B2, IFNA2, IFNA6, IFNA8, IFNA21, KCNA10, KIR2DL2, MAGEB4, MTNR1B, MYF5, NTSR1, OR3A1, PLIN1, PNLIPRP1, RNASE3, SERPINB4, CCL11, TFF2, TAAR5, CRISP3, OLFM4, SPINK5, SMPX, OR11A1, OR10H2, OR7C2, CHIA, GNMT, KLK14, TAS2R3, TAS2R7, TAS2R13, RXFP3, LGSN, BTNL2, CABP5, EDDM3B, OR12D3, PMFBP1, MTSS1L, SEC14L3, OR7A10                              |
| FGF17  | Fgf17  | One-to-one  | 73 | 0.333333 | SERPINA3, ATP12A, CBLN1, CCK, CCR3, CST1, CST2, CST5, CYP26A1, DIO1, DMRT1, ELAVL4, GC, HSD3B2, IFNA4, IFNA5, IFNA6, IFNA7, IFNA10, IFNA21, IVL, KIR2DL3, KIR3DL1, MAGEA8, CEACAM6, NEFM, PRL, RPL3L, RS1, SERPINB3, SERPINB4, SLC5A4, SERPINA7, OR1E1, INA, SLC28A1, TAAR2, SPAG6, CST8, TBR1, CLCA4, ATP1B4, OR2F1, FGF20, FGF21, OR7A17, OR10H1, OR7E24, TEK2, IL19, TAS2R7, GPR87, L1TD1, VRTN, CABP5, AICDA, TMEM35, NEUROD6, PRDM14, OR12D3                                                        |
| FGF4   | Fgf4   | One-to-one  | 74 | 37       | ACVR2B, ATP12A, CA4, CKMT2, CRABP1, CRYM, CSN2, CST4, DMBT1, EN2, MLANA, GAP43, GJB3, GLI1, GPR15, GPX2, GRB7, KRT2, MAGEA8, MAGEA12, MEP1B, MT3, NNAT, NODAL, PGC, PHEX, PHKG1P1, PRL, PRPH, PRSS1, PRSS3, RHAG, RHCE, RLBP1, SH3GL3, PMEL, SLC5A1, SLC5A4, SYCP1, TTPA, TULP2, ZIC3, CUBN, TCL1A, EPX, OR6A2, PTCH2, FOXH1, CLDN9, INA, SLC28A1, GDF3, MAGEC1, GPA33, LEFTY1, TBR1, ZNF365, SULT4A1, OR2H1, RBMXL2, TFCP2L1, PIPOX, L1TD1, TMEM40, TEX15, RNF17, NEUROD6, PRDM14, LIN28AP1, ZNRF4      |
